# Supplementary material for: Carbones (–C2−–), carbenes (–C:–) and carbodications (–C2+–) on the magnetic criterion
Source: Royal Society of Chemistry journal article supplement (doi:10.1039/d4ob00063c), 2024-01-01
Supplement: d4ob00063c1.pdf [file d4ob00063c1.pdf]

1:

## Organic & Biomolecular Chemistry

### Carbones ( $-C^{2-}$ ), carbenes ( $-C:-$ ) and carbocations ( $-C^{2+}$ ) on the magnetic criterion

Erich Kleinpeter\* and Andreas Koch

*Universität Potsdam, Institut für Chemie, Karl-Liebknecht-Str. 24-25, D-14476  
Potsdam(Golm), Germany*

Corresponding author: Erich Kleinpeter, E-mail: [ekleinp@uni-potsdam.de](mailto:ekleinp@uni-potsdam.de),

**ORCID-ID:** <https://orcid.org/0000-0001-8993-0033>.

Author: Andreas Koch, E-mail: [Andreas.Koch@uni-potsdam.de](mailto:Andreas.Koch@uni-potsdam.de),

**ORCID-ID:** <https://orcid.org/0009-0002-4375-6767>.

### Electronically Supplementary Information

**Table S1.** Coordinates and absolute energies of the Compounds 1–11 studied at the MP2/6-311G(d,p) level of theory.

#### 1

MP2= -116,6080181 eV

|   |   |           |           |           |
|---|---|-----------|-----------|-----------|
| 1 | 6 | 1.346200  | 0.000059  | 0.000004  |
| 2 | 6 | -0.000001 | -0.000023 | 0.000059  |
| 3 | 6 | -1.346200 | -0.000005 | -0.000007 |
| 4 | 1 | 1.726108  | -0.821840 | 0.676473  |
| 5 | 1 | 1.726694  | 0.996606  | 0.373357  |

# 2:

|   |   |           |           |           |
|---|---|-----------|-----------|-----------|
| 6 | 1 | 1.726394  | -0.175355 | -1.049794 |
| 7 | 1 | -1.725796 | 0.825336  | -0.672458 |
| 8 | 1 | -1.726770 | 0.169752  | 1.050549  |
| 9 | 1 | -1.726625 | -0.994682 | -0.378460 |

## 2

MP2= -117,1376369 eV

|   |   |           |           |           |
|---|---|-----------|-----------|-----------|
| 1 | 6 | -1.142178 | 0.132494  | 0.000000  |
| 2 | 6 | 0.000004  | -0.767084 | 0.000003  |
| 3 | 6 | 1.142173  | 0.132489  | -0.000014 |
| 4 | 1 | -1.190950 | 0.924242  | 0.905267  |
| 5 | 1 | -2.155017 | -0.342229 | -0.000003 |
| 6 | 1 | -1.190910 | 0.924273  | -0.905260 |
| 7 | 1 | 1.190900  | 0.924285  | -0.905239 |
| 8 | 1 | 2.155012  | -0.342225 | -0.000007 |
| 9 | 1 | 1.190968  | 0.924260  | 0.905309  |

## 3

MP2= -117,4255018 eV

|   |   |           |           |           |
|---|---|-----------|-----------|-----------|
| 1 | 6 | -1.225221 | 0.162129  | -0.016812 |
| 2 | 6 | -0.000060 | -0.669566 | -0.055230 |
| 3 | 6 | 1.225126  | 0.162221  | -0.016730 |
| 4 | 1 | -1.416867 | 0.170172  | 1.073632  |
| 5 | 1 | -2.093153 | -0.340031 | -0.449822 |
| 6 | 1 | -1.147833 | 1.205982  | -0.356990 |
| 7 | 1 | 1.147087  | 1.206956  | -0.354045 |
| 8 | 1 | 2.091924  | -0.338887 | -0.453286 |
| 9 | 1 | 1.419771  | 0.167109  | 1.073142  |

## 4

MP2= -305,6649538 eV

|    |   |           |           |           |
|----|---|-----------|-----------|-----------|
| 1  | 6 | -2.499399 | 0.985707  | -0.277444 |
| 2  | 7 | -1.345046 | 0.009714  | -0.141651 |
| 3  | 6 | -0.166471 | 0.377114  | -0.300923 |
| 4  | 7 | 1.012078  | 0.744350  | -0.460414 |
| 5  | 6 | 1.843021  | 1.252499  | 0.703824  |
| 6  | 6 | 1.672677  | 0.699982  | -1.826373 |
| 7  | 6 | -1.681491 | -1.431422 | 0.195530  |
| 8  | 1 | -3.132921 | 0.594727  | -1.075538 |
| 9  | 1 | -2.106875 | 1.972717  | -0.519859 |
| 10 | 1 | -3.014401 | 0.980031  | 0.684802  |
| 11 | 1 | 2.706953  | 0.588919  | 0.770265  |
| 12 | 1 | 1.241404  | 1.224877  | 1.611735  |
| 13 | 1 | 2.136588  | 2.270895  | 0.443373  |
| 14 | 1 | 0.958412  | 0.321727  | -2.557033 |
| 15 | 1 | 2.535140  | 0.039066  | -1.723294 |
| 16 | 1 | 1.974817  | 1.724921  | -2.048698 |
| 17 | 1 | -2.325055 | -1.787793 | -0.610711 |

# 3:

|    |   |           |           |          |
|----|---|-----------|-----------|----------|
| 18 | 1 | -2.210137 | -1.402591 | 1.149924 |
| 19 | 1 | -0.759458 | -2.008079 | 0.261586 |

## 5

MP2= -306,0029615 eV

|    |   |           |           |           |
|----|---|-----------|-----------|-----------|
| 2  | 7 | 1.092151  | -0.107592 | 0.614004  |
| 3  | 6 | 0.017468  | 0.553963  | -0.116431 |
| 4  | 7 | -1.234267 | 0.041240  | 0.426869  |
| 5  | 6 | -2.327705 | 0.759466  | -0.182626 |
| 6  | 6 | -1.428952 | -1.370566 | 0.062035  |
| 7  | 6 | 2.352207  | 0.276144  | 0.024665  |
| 8  | 1 | 1.947579  | -0.171240 | 2.597637  |
| 9  | 1 | 0.171308  | 0.133390  | 2.463026  |
| 10 | 1 | 1.276795  | 1.476496  | 2.048843  |
| 11 | 1 | -2.275914 | 0.672023  | -1.304210 |
| 12 | 1 | -2.211415 | 1.821808  | 0.071918  |
| 13 | 1 | -3.294174 | 0.369252  | 0.170701  |
| 14 | 1 | -0.575426 | -1.931318 | 0.458411  |
| 15 | 1 | -1.411201 | -1.494426 | -1.061017 |
| 16 | 1 | -2.376551 | -1.791731 | 0.503393  |
| 17 | 1 | 3.192500  | -0.169111 | 0.578602  |
| 18 | 1 | 2.457657  | 1.397345  | 0.022684  |
| 19 | 1 | 2.345650  | -0.057143 | -1.022110 |

## 6

MP2= -306,3115994 eV

|    |   |           |           |           |
|----|---|-----------|-----------|-----------|
| 1  | 6 | 1.487791  | -0.869646 | 0.805567  |
| 2  | 7 | 1.252167  | 0.161594  | -0.208128 |
| 3  | 6 | 0.105282  | 0.422699  | -0.879403 |
| 4  | 7 | -1.043406 | 0.062910  | -0.258741 |
| 5  | 6 | -2.267180 | 0.225259  | -1.032464 |
| 6  | 6 | -1.282599 | -0.084020 | 1.179232  |
| 7  | 6 | 2.477870  | 0.662797  | -0.815672 |
| 8  | 1 | 2.394879  | -1.417386 | 0.528601  |
| 9  | 1 | 0.658312  | -1.576433 | 0.813337  |
| 10 | 1 | 1.632265  | -0.466500 | 1.814593  |
| 11 | 1 | -2.871842 | -0.688074 | -0.988777 |
| 12 | 1 | -1.982519 | 0.426241  | -2.063421 |
| 13 | 1 | -2.869259 | 1.058341  | -0.645011 |
| 14 | 1 | -0.453813 | 0.350227  | 1.737945  |
| 15 | 1 | -1.429351 | -1.123572 | 1.494411  |
| 16 | 1 | -2.189453 | 0.475782  | 1.431794  |
| 17 | 1 | 3.080021  | -0.161001 | -1.222379 |
| 18 | 1 | 3.081399  | 1.198993  | -0.074095 |
| 19 | 1 | 2.195703  | 1.342156  | -1.617649 |

## 7

MP2= -116,3051214 eV

# 4:

|   |   |           |           |           |
|---|---|-----------|-----------|-----------|
| 1 | 1 | 1.869873  | -0.658643 | 0.658868  |
| 2 | 1 | -1.869873 | -0.659133 | -0.658378 |
| 3 | 6 | -1.312868 | -0.000054 | -0.000036 |
| 4 | 6 | -0.000000 | 0.000154  | -0.000000 |
| 5 | 6 | 1.312868  | -0.000054 | 0.000036  |
| 6 | 1 | -1.869698 | 0.658998  | 0.658592  |
| 7 | 1 | 1.869698  | 0.658507  | -0.659082 |

# 8

MP2= -960,3109898 eV

|    |   |           |           |           |
|----|---|-----------|-----------|-----------|
| 1  | 6 | 4.120055  | -0.876856 | 1.047508  |
| 2  | 6 | 4.696919  | 0.127129  | 0.023400  |
| 3  | 7 | 3.436150  | 0.712111  | -0.562869 |
| 4  | 6 | 2.376092  | 0.039569  | -0.227037 |
| 5  | 6 | 2.641959  | -1.136349 | 0.670724  |
| 6  | 6 | 3.457454  | 1.880346  | -1.449472 |
| 7  | 6 | 5.507061  | 1.234986  | 0.687774  |
| 8  | 6 | 5.485004  | -0.545005 | -1.102015 |
| 9  | 7 | 1.152075  | 0.398119  | -0.721147 |
| 10 | 6 | 0.000058  | 0.000426  | -0.597748 |
| 11 | 7 | -1.151949 | -0.397121 | -0.721583 |
| 12 | 6 | -2.376039 | -0.039166 | -0.227254 |
| 13 | 7 | -3.435857 | -0.712131 | -0.562983 |
| 14 | 6 | -4.696801 | -0.127707 | 0.023460  |
| 15 | 6 | -4.120252 | 0.876572  | 1.047457  |
| 16 | 6 | -2.642291 | 1.136653  | 0.670529  |
| 17 | 6 | -3.456770 | -1.880382 | -1.449580 |
| 18 | 6 | -5.506341 | -1.235925 | 0.687955  |
| 19 | 6 | -5.485347 | 0.544058  | -1.101856 |
| 20 | 6 | -1.720250 | 1.115828  | 1.895775  |
| 21 | 6 | -2.434857 | 2.435703  | -0.130194 |
| 22 | 6 | 2.433941  | -2.435347 | -0.129918 |
| 23 | 6 | 1.720032  | -1.115093 | 1.896060  |
| 24 | 1 | 4.166933  | -0.436768 | 2.048926  |
| 25 | 1 | 4.699945  | -1.803414 | 1.056234  |
| 26 | 1 | 2.474294  | 2.001700  | -1.902324 |
| 27 | 1 | 4.210950  | 1.716230  | -2.220719 |
| 28 | 1 | 3.716948  | 2.761217  | -0.859216 |
| 29 | 1 | 5.924824  | 1.931683  | -0.044291 |
| 30 | 1 | 6.343515  | 0.773668  | 1.220839  |
| 31 | 1 | 4.902389  | 1.785897  | 1.414767  |
| 32 | 1 | 6.366499  | -1.021997 | -0.664322 |
| 33 | 1 | 5.836700  | 0.180746  | -1.840225 |
| 34 | 1 | 4.894509  | -1.312510 | -1.608833 |
| 35 | 1 | -4.166854 | 0.436527  | 2.048906  |
| 36 | 1 | -4.700512 | 1.802898  | 1.056182  |
| 37 | 1 | -2.473700 | -2.001131 | -1.902794 |
| 38 | 1 | -4.210652 | -1.716724 | -2.220543 |
| 39 | 1 | -3.715507 | -2.761412 | -0.859228 |
| 40 | 1 | -5.923878 | -1.932826 | -0.044048 |
| 41 | 1 | -6.342943 | -0.774994 | 1.221122  |
| 42 | 1 | -4.901318 | -1.786549 | 1.414873  |

# 5:

|    |   |           |           |           |
|----|---|-----------|-----------|-----------|
| 43 | 1 | -5.836829 | -0.181851 | -1.840014 |
| 44 | 1 | -4.895268 | 1.311822  | -1.608761 |
| 45 | 1 | -6.366993 | 1.020661  | -0.664041 |
| 46 | 1 | -2.035268 | 1.902681  | 2.587906  |
| 47 | 1 | -0.679751 | 1.319651  | 1.620271  |
| 48 | 1 | -1.773583 | 0.157019  | 2.421328  |
| 49 | 1 | -2.677626 | 3.286047  | 0.514117  |
| 50 | 1 | -3.076076 | 2.479504  | -1.014087 |
| 51 | 1 | -1.391992 | 2.543081  | -0.448334 |
| 52 | 1 | 2.676407  | -3.285756 | 0.514421  |
| 53 | 1 | 3.075088  | -2.479453 | -1.013849 |
| 54 | 1 | 1.391012  | -2.542327 | -0.447988 |
| 55 | 1 | 0.679444  | -1.318593 | 1.620659  |
| 56 | 1 | 2.034852  | -1.901974 | 2.588248  |
| 57 | 1 | 1.773728  | -0.156239 | 2.421493  |

# 9

MP2= -381,6820875 eV

|    |   |           |           |           |
|----|---|-----------|-----------|-----------|
| 1  | 6 | 3.235383  | 0.950262  | 0.874121  |
| 2  | 6 | 2.520894  | 0.000035  | 0.000060  |
| 3  | 7 | 1.209863  | -0.000141 | -0.000307 |
| 4  | 6 | -0.000002 | -0.000153 | -0.000390 |
| 5  | 7 | -1.209869 | -0.000021 | -0.001033 |
| 6  | 6 | -2.520906 | -0.000040 | -0.000068 |
| 7  | 6 | -3.235177 | -0.950142 | 0.874312  |
| 8  | 6 | -3.236328 | 0.949943  | -0.873568 |
| 9  | 6 | 3.236103  | -0.949901 | -0.873689 |
| 10 | 1 | 4.138465  | 0.474528  | 1.271266  |
| 11 | 1 | 2.611196  | 1.368378  | 1.663045  |
| 12 | 1 | 3.582828  | 1.764853  | 0.213368  |
| 13 | 1 | -4.138123 | -0.474297 | 1.271638  |
| 14 | 1 | -2.610793 | -1.368143 | 1.663144  |
| 15 | 1 | -3.582826 | -1.764802 | 0.213762  |
| 16 | 1 | -3.583419 | 1.764404  | -0.212422 |
| 17 | 1 | -4.139694 | 0.474064  | -1.269895 |
| 18 | 1 | -2.612934 | 1.368252  | -1.663003 |
| 19 | 1 | 2.612278  | -1.368815 | -1.662462 |
| 20 | 1 | 3.584516  | -1.763867 | -0.212686 |
| 21 | 1 | 4.138745  | -0.473445 | -1.271038 |

# 10

MP2= -349,0410175 eV

|   |   |           |           |           |
|---|---|-----------|-----------|-----------|
| 1 | 6 | -3.401973 | 0.858482  | -0.957199 |
| 2 | 6 | -2.609756 | 0.000360  | 0.000291  |
| 3 | 6 | -3.402683 | -0.858134 | 0.956887  |
| 4 | 6 | -1.283489 | -0.000920 | -0.000288 |
| 5 | 6 | 0.000024  | 0.000010  | 0.000277  |
| 6 | 1 | -4.051520 | 0.228996  | -1.577893 |
| 7 | 6 | 1.283534  | -0.001172 | -0.000305 |
| 8 | 6 | 2.609809  | -0.000039 | 0.000023  |

# 6:

|    |   |           |           |           |
|----|---|-----------|-----------|-----------|
| 9  | 6 | 3.403074  | -0.956912 | -0.857892 |
| 10 | 6 | 3.401512  | 0.957693  | 0.858253  |
| 11 | 1 | -2.746901 | 1.439972  | -1.608682 |
| 12 | 1 | -4.048764 | 1.546665  | -0.399097 |
| 13 | 1 | -4.047195 | -1.547953 | 0.398131  |
| 14 | 1 | -4.054556 | -0.229032 | 1.575493  |
| 15 | 1 | -2.748102 | -1.437979 | 1.610329  |
| 16 | 1 | 2.748685  | -1.607416 | -1.441246 |
| 17 | 1 | 4.051222  | -1.578649 | -0.228002 |
| 18 | 1 | 4.051353  | -0.398353 | -1.544309 |
| 19 | 1 | 4.049381  | 0.399906  | 1.545687  |
| 20 | 1 | 2.746110  | 1.608120  | 1.440558  |
| 21 | 1 | 4.049969  | 1.579506  | 0.228754  |

# 11

MP2= -492,2279820 eV

|    |   |           |           |           |
|----|---|-----------|-----------|-----------|
| 1  | 6 | -3.731726 | 1.039377  | 0.948139  |
| 2  | 7 | -3.507641 | -0.049985 | -0.021933 |
| 3  | 6 | -2.333040 | -0.458680 | -0.380532 |
| 4  | 7 | -1.208693 | 0.113669  | 0.136247  |
| 5  | 6 | -0.000010 | -0.014239 | -0.000419 |
| 6  | 7 | 1.208712  | 0.113702  | -0.136546 |
| 7  | 6 | 2.332953  | -0.458741 | 0.380337  |
| 8  | 7 | 3.507627  | -0.049973 | 0.022064  |
| 9  | 6 | 3.731934  | 1.039432  | -0.947866 |
| 10 | 6 | 4.720234  | -0.675184 | 0.594403  |
| 11 | 6 | -4.720356 | -0.675075 | -0.594111 |
| 12 | 1 | -2.777933 | 1.409965  | 1.316350  |
| 13 | 1 | -4.333545 | 0.636231  | 1.764805  |
| 14 | 1 | -4.283354 | 1.830460  | 0.436233  |
| 15 | 1 | -2.253474 | -1.267191 | -1.105165 |
| 16 | 1 | 2.253223  | -1.267351 | 1.104843  |
| 17 | 1 | 4.332682  | 0.635978  | -1.765180 |
| 18 | 1 | 4.284756  | 1.829832  | -0.436202 |
| 19 | 1 | 2.778194  | 1.411058  | -1.315168 |
| 20 | 1 | 5.302881  | -1.093496 | -0.228133 |
| 21 | 1 | 4.435902  | -1.456887 | 1.297595  |
| 22 | 1 | 5.292981  | 0.104075  | 1.100095  |
| 23 | 1 | -5.293350 | 0.104325  | -1.099310 |
| 24 | 1 | -5.302724 | -1.093775 | 0.228427  |
| 25 | 1 | -4.436199 | -1.456463 | -1.297725 |
